# Supplementary material
Source: PubMed Central journal article supplement (PMC9559962)
Supplement: mmc1.pdf [file mmc1.pdf]

**Supplemental Table A.** Cohort definition of adults with diabetic retinopathy, glaucoma, cataract, and age-related macular degeneration in *All of Us*. Participants with the following qualifying Systematized Nomenclature of Medicine Clinical Terms (SNOMED-CT) codes were included in the respective cohorts.

| <b>Diagnosis Cohort</b>          | <b>SNOMED -CT Code</b> | <b>Description</b>                                                                                                                                                                                                                                                                          |
|----------------------------------|------------------------|---------------------------------------------------------------------------------------------------------------------------------------------------------------------------------------------------------------------------------------------------------------------------------------------|
| Diabetic Retinopathy             | 4855003                | Retinopathy due to diabetes mellitus<br><br>Link to branching logic and sources:<br><a href="https://databrowser.researchallofus.org/ehr/conditions/diabetic%20retinopathy?search=4174977">https://databrowser.researchallofus.org/ehr/conditions/diabetic%20retinopathy?search=4174977</a> |
| Glaucoma                         | 23986001               | Glaucoma<br><br>Link to branching logic and sources:<br><a href="https://databrowser.researchallofus.org/ehr/conditions/glaucoma?search=437541">https://databrowser.researchallofus.org/ehr/conditions/glaucoma?search=437541</a>                                                           |
| Cataract                         | 193570009              | Cataract<br><br>Link to branching logic and sources:<br><a href="https://databrowser.researchallofus.org/ehr/conditions/cataract?search=375545">https://databrowser.researchallofus.org/ehr/conditions/cataract?search=375545</a>                                                           |
| Age-Related Macular Degeneration | 267718000              | Age-related macular degeneration<br><br>Link to branching logic and sources:<br><a href="https://databrowser.researchallofus.org/ehr/conditions/macular%20degeneration?search=374028">https://databrowser.researchallofus.org/ehr/conditions/macular%20degeneration?search=374028</a>       |
